# Supplementary material for: Use of chitosan to reinforce transparent conductive cellulose nanopaper
Source: Royal Society of Chemistry journal article supplement (doi:10.1039/c7tc03980h), 2017-11-29
Supplement: c7tc03980h1.pdf [file c7tc03980h1.pdf]

## Electronic Supplementary Information

### Use of chitosan to reinforce transparent conductive cellulose nanopaper

Huaiyu Zhang,<sup>a</sup> Liyi Shi,<sup>b</sup> Xin Feng<sup>b,\*</sup>

<sup>a</sup> School of Environmental and Chemical Engineering, Shanghai University, Shanghai  
200444, P. R. China.

<sup>b</sup> Research Center of Nano Science and Technology, Shanghai University, Shanghai  
200444, P. R. China.

\* Corresponding Author: [fengxin@shu.edu.cn](mailto:fengxin@shu.edu.cn)

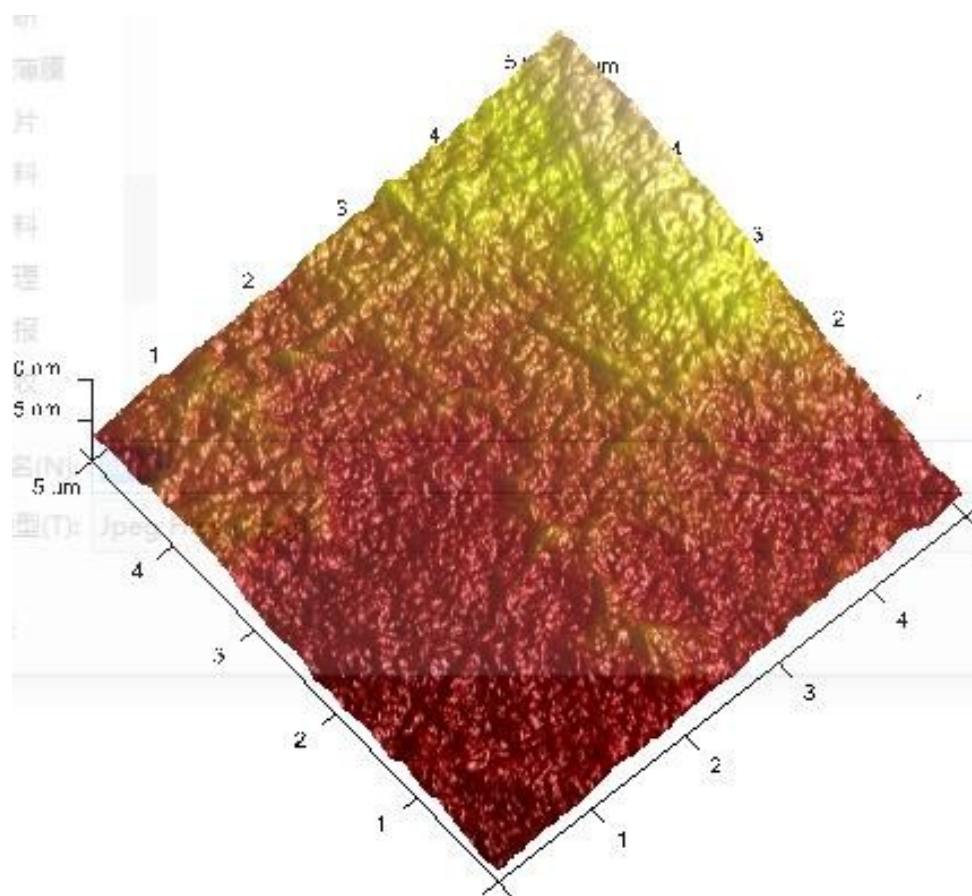

**Fig. S1.** AFM images of ONC/CS 80/20 w/w TCCNP.

**Table S1.** Tensile test results of TCCNP with different ONC/CS ratios

| Samples               | ONC/CS<br>100/0 | ONC/CS<br>90/10 | ONC/CS<br>80/20 | ONC/CS<br>70/30 |
|-----------------------|-----------------|-----------------|-----------------|-----------------|
| Stress (MPa)          | 14.38           | 26.38           | 29.11           | 30.75           |
| Module (MPa)          | 12.24           | 14.84           | 11.89           | 14.52           |
| Strain at failure (%) | 1.18            | 1.78            | 2.45            | 2.12            |
